# Supplementary material
Source: publisher site journal article supplement (https://www.dovepress.com/article/supplementary_file/548401/548401%20Revised%20Supplementary%20Materials_1.docx)
Supplement: Supplementary file 1 [file 548401%20Revised%20Supplementary%20Materials_1.docx]

**Supplementary Material**

**Supplementary Methods:** ​**TCMC Scoring and Classification Criteria**

Each TCMC type was classified into one of three categories: "confirmed," "prone," or "none," expressed as balanced constitution (confirmed/prone/none), based on the total scores of respective constitution items. Specifically: 1) For non-balanced constitutions, a total score ≥11 points indicated a "confirmed" constitution, while scores of 9-10 points indicated a "prone" status; 2) For the Balanced constitution, a score ≥17 points combined with all other constitution scores ≤8 points defined a "confirmed" balanced constitution. A score ≥17 points for balanced constitution with any other constitution score ≤10 points (but ≥9 points) indicated a "prone to balanced" status. All other cases were classified as "non-balanced" constitutions.

**Table S1** Sensitivity Analysis of the Association Between Qi-stagnation Constitution and Cognitive Frailty

| Variables | aOR | 95%CI of aOR | *P*-value |
| --- | --- | --- | --- |
| QSC | 11.13 | 1.84~67.20 | 0.009 |
| Residence | 2.700 | 1.62~4.50 | <0.001 |
| Mild depression | 1.590 | 0.73~3.48 | 0.243 |
| Moderate or severe depression | 10.600 | 1.92~58.52 | 0.007 |
| Education level | 0.720 | 0.59~0.89 | 0.003 |
| Smartphone use | 0.320 | 0.19~0.53 | <0.001 |

**Notes:** Model 4 presents the results of a sensitivity analysis, which includes the 'senior residence' variable but excludes ADL and IADL from the adjustment set of the full model (Model 3).

**Abbreviations:** CF, cognitive frailty; aOR, adjusted odds ratio; QSC, Qi-stagnation constitution; ADL, activities of daily living; IADL, instrumental activities of daily living.
